# Supplementary material for: Mental Health Status of New Police Trainees before and during the COVID-19 Pandemic
Source: MDPI journal article supplement (doi:10.3390/healthcare12060645), 2024-03-13
Supplement: s1 [file s1]

**Supplementary Table S1. Difference prevalence after PSM**

| N=4,824 (2019, 2020)     |                  | Insomnia  |           |            | Depression |           |            | Anxiety   |           |            |
|--------------------------|------------------|-----------|-----------|------------|------------|-----------|------------|-----------|-----------|------------|
|                          |                  | 2019      | 2020      | Difference | 2019       | 2020      | Difference | 2019      | 2020      | Difference |
|                          |                  | (N=2,412) | (N=2,412) | (95%CI)    | (N=2,412)  | (N=2,412) | (95%CI)    | (N=2,412) | (N=2,412) | (95%CI)    |
| Total                    |                  | 2         | 2.9       | 0.9*       | 0.4        | 1.3       | 0.9*       | 1.2       | 3.2       | 2.0*       |
|                          |                  | (1.5-2.7) | (2.3-3.7) | (0.0-1.8)  | (0.2-0.7)  | (0.8-1.8) | (0.4-1.4)  | (0.8-1.7) | (2.5-4.0) | (1.2-2.8)  |
| Sex                      | men              | 1.7       | 2         | 2.9        | 0.2        | 0.8       | 0.6*       | 0.6       | 1.7       | 1.0*       |
|                          |                  | (1.2-2.4) | (1.4-2.8) | (-0.6-1.2) | (0.0-0.5)  | (0.4-1.3) | (0.2-1.1)  | (0.3-1.1) | (1.1-2.4) | (0.3-1.7)  |
|                          | women            | 2.9       | 5.6       | 2.7*       | 0.9        | 2.4       | 1.5*       | 2.6       | 7.1       | 4.6*       |
|                          |                  | (1.8-4.5) | (4.0-7.7) | (0.5-4.9)  | (0.3-1.9)  | (1.4-3.9) | (0.1-2.9)  | (1.5-4.1) | (5.3-9.4) | (2.2-6.9)  |
| Age group                | 20-29            | 2.2       | 2.9       | 0.7        | 0.4        | 1.3       | 0.8*       | 1.1       | 3.1       | 2.0*       |
|                          |                  | (0.6-2.9) | (2.3-3.8) | (-0.2-1.7) | (0.2-0.9)  | (0.8-1.8) | (0.3-1.4)  | (0.7-1.8) | (2.4-4.0) | (1.1-2.9)  |
|                          | ≥30              | 1.5       | 3.3       | 1.8        | 0.2        | 1.1       | 0.9        | 1.2       | 3.3       | 2.1        |
|                          |                  | (0.7-2.9) | (1.5-6.1) | (-0.6-0.4) | (0.0-0.9)  | (0.2-3.2) | (-0.4-2.2) | (0.5-2.4) | (1.5-6.1) | (-0.2-0.4) |
| Education group          | < College degree | 2.3       | 2.5       | 0.2        | 0.2        | 0.6       | 0.3        | 0.9       | 2.3       | 1.4*       |
|                          |                  | (1.5-3.3) | (1.7-3.4) | (-1.0-1.4) | (0.0-0.7)  | (0.2-1.1) | (-0.1-0.8) | (0.4-1.5) | (1.3-3.3) | (0.5-2.4)  |
|                          | ≥ College degree | 1.7       | 3.7       | 1.9*       | 0.5        | 2.2       | 1.7*       | 1.5       | 4.3       | 2.8*       |
|                          |                  | (1.1-2.7) | (2.6-5.0) | (0.5-3.3)  | (0.2-1.1)  | (1.4-3.3) | (0.7-2.7)  | (0.9-2.4) | (3.1-5.7) | (1.4-4.2)  |
| Monthly household income | < 4,000 USD      | 2.3       | 3.8       | 1.5*       | 0.2        | 1.7       | 1.5*       | 1.1       | 4.7       | 3.6*       |
|                          |                  | (1.6-3.3) | (2.8-5.1) | (0.1-2.9)  | (0.1-0.7)  | (1.0-2.6) | (0.7-2.3)  | (0.6-1.9) | (3.6-6.1) | (2.1-4.8)  |
|                          | ≥ 4,000 USD      | 1.8       | 2.2       | 0.4        | 0.5        | 0.2       | 0.3        | 1.2       | 1.7       | 0.5        |
|                          |                  | (1.1-2.7) | (1.4-3.2) | (-0.7-1.5) | (0.2-1.1)  | (0.4-1.5) | (-0.4-0.9) | (0.7-2.1) | (1.1-2.6) | (-0.4-1.4) |

\* PSM with sex age group, education levels and monthly household income
